# Supplementary material for: Insight into Microevolution of Yersinia pestis by Clustered Regularly Interspaced Short Palindromic Repeats
Source: PLoS One. 2008 Jul 9;3(7):e2652. doi: 10.1371/journal.pone.0002652 (PMC2440536; doi:10.1371/journal.pone.0002652)
Supplement: Table S1 — Properties of strains (0.05 MB XLS) [file pone.0002652.s004.xls]

## Sheet: TableS1-Spacer array
Table S1 Properties of strains
Strain number	Biovar/subcpecies	Source	Foci code	Foci name	Hosts/Vectors	Clusters	YPa	YPb	YPc	Genotypes
D1961001	Medievalis	Qinghai Menyuan, China	D	Marmota himalayana plague focus of the Qilian Mountain	Marmota himalayana	Cb2	a1-a2-a3	b1-b2	c1-c2-c3	1
H1957001	Medievalis	Inner Mongolia Xisuniteyouqi, China	H	Spermophilus dauricus plague focus of the Song-liao plain	Ophthalmopsylla kiritschenkoi	Cb2	a1-a2-a3	b1-b2	c1-c2-c3	1
I1978002	Medievalis	Inner Mongolia Siziwangqi, China	I	Meriones unguiculatus plague focus of the Inner Mogolian Plateau	Meriones unguiculatus	Cb2	a1-a2-a3	b1-b2	c1-c2-c3	1
J1962002	Medievalis	Ningxia Haiyuan, China	J	Spermophilus dauricus alaschanicus plague focus of the Loess Plateau in Gansu and Ningxia provinces	patient	Cb2	a1-a2-a3	b1-b2	c1-c2-c3	1
J1963002	Medievalis	Gansu Huining, China	J	Spermophilus dauricus alaschanicus plague focus of the Loess Plateau in Gansu and Ningxia provinces	Citellophilus tesquorum	Cb2	a1-a2-a3	b1-b2	c1-c2-c3	1
J1977003	Medievalis	Gansu Jingyuan, China	J	Spermophilus dauricus alaschanicus plague focus of the Loess Plateau in Gansu and Ningxia provinces	Spermophilus dauricus alaschanicus	Cb2	a1-a2-a3	b1-b2	c1-c2-c3	1
J1977005	Medievalis	Ningxia Guyuan, China	J	Spermophilus dauricus alaschanicus plague focus of the Loess Plateau in Gansu and Ningxia provinces	Spermophilus dauricus alaschanicus	Cb2	a1-a2-a3-a77	b1-b2	c1-c2-c3	2
I1997001	Medievalis	Inner Mongolia Duolun, China	I	Meriones unguiculatus plague focus of the Inner Mogolian Plateau	Neopsylla abagaitui	Cb2	a1-a2-a3-a56-a57	b1-b2	c1-c2-c3	3
I2001003	Medievalis	Shanxi Dingbian, China	I	Meriones unguiculatus plague focus of the Inner Mogolian Plateau	Meriones unguiculatus	Cb2	a1-a2-a3	b1-b2-b29	c1-c2-c3	4
I1998001	Medievalis	Inner Mongolia Wushenqi, China	I	Meriones unguiculatus plague focus of the Inner Mogolian Plateau	Dipus sagitta	Cb2	a1-a2-a3-a54	b1-b2-b29	c1-c2-c3	5
I1970004	Medievalis	Inner Mongolia Etuokeqi, China	I	Meriones unguiculatus plague focus of the Inner Mogolian Plateau	Ceratophylloidea	Cb2	a1-a2-a3-a55	b1-b2	c1-c2-c3	6
I1975001	Medievalis	Ningxia Taole, China	I	Meriones unguiculatus plague focus of the Inner Mogolian Plateau	Meriones unguiculatus	Cb2	a1-a2-a3-a55	b1-b2	c1-c2-c3	6
C1989001	Antiqua	Qinghai Zhaduo, China	C	Marmota himalayana plague focus of the Qinghai–Gansu–Tibet Grassland	patient body	Cb4	a1-a2-a3	b1-b2-b3-b4	c1-c2-c3	7
C1991001	Antiqua	Qinghai Geermu, China	C	Marmota himalayana plague focus of the Qinghai–Gansu–Tibet Grassland	Marmota himalayana	Cb4	a1-a2-a3	b1-b2-b3-b4	c1-c2-c3	7
C2004001	Antiqua	Qinghai Angqian, China	C	Marmota himalayana plague focus of the Qinghai–Gansu–Tibet Grassland	patient body	Cb4	a1-a2-a3	b1-b2-b3-b4	c1-c2-c3	7
G1966002	Antiqua	Tibet Zhongba, China	G	Marmota himalayana plague focus of the Gangdisi Mountains	patient body	Cb4	a1-a2-a3	b1-b2-b3-b4	c1-c2-c3	7
G1995003	Antiqua	Tibet Cuona, China	G	Marmota himalayana plague focus of the Gangdisi Mountains	Marmota himalayana	Cb4	a1-a2-a3	b1-b2-b3-b4	c1-c2-c3	7
G1996002	Antiqua	Tibet Dazi, China	G	Marmota himalayana plague focus of the Gangdisi Mountains	Marmota himalayana	Cb4	a1-a2-a3	b1-b2-b3-b4	c1-c2-c3	7
H1953001	Antiqua	Jilin Changling, China	H	Spermophilus dauricus plague focus of the Song-liao plain	patient body	Cb4	a1-a2-a3	b1-b2-b3-b4	c1-c2-c3	7
H1954002	Antiqua	Heilongjiang Haerbin, China	H	Spermophilus dauricus plague focus of the Song-liao plain	Spermophilus dauricus	Cb4	a1-a2-a3	b1-b2-b3-b4	c1-c2-c3	7
H1971001	Antiqua	Inner Mongolia Xisuniteyouqi, China	H	Spermophilus dauricus plague focus of the Song-liao plain	Spermophilus dauricus	Cb4	a1-a2-a3	b1-b2-b3-b4	c1-c2-c3	7
H1988001	Antiqua	Inner Mongolia Zhenglanqi, China	H	Spermophilus dauricus plague focus of the Song-liao plain	Spermophilus dauricus	Cb4	a1-a2-a3	b1-b2-b3-b4	c1-c2-c3	7
G1968001	Antiqua	Tibet Zhongba, China	G	Marmota himalayana plague focus of the Gangdisi Mountains	Marmota himalayana	Cb4	a1-a2-a3-a75	b1-b2-b3-b4	c1-c2-c3	8
K11973006	Medievalis	Xinjiang Hetian, China	K	Marmota himalayana plague focus of the Kunlun Mountains	Marmota himalayana	Cb4'	a1-a2-a3	b1-b2-b3-b4'	c1-c2-c3	9
O2005013	Medievalis	Xinjiang Alashankou, China	O	Rhombomys opimus plague focus of the Junggar Basin	Xenopsylla minax	Cb4'	a1-a2-a3	b1-b2-b3-b4'	c1-c2-c3	9
O2005014	Medievalis	Xinjiang Alashankou, China	O	Rhombomys opimus plague focus of the Junggar Basin	Xenopsylla minax	Cb4'	a1-a2-a3	b1-b2-b3-b4'	c1-c2-c3	9
O2005015	Medievalis	Xinjiang Alashankou, China	O	Rhombomys opimus plague focus of the Junggar Basin	Xenopsylla minax	Cb4'	a1-a2-a3	b1-b2-b3-b4'	c1-c2-c3	9
K21987001	/	Xinjiang Qiemo, China	K	Marmota himalayana plague focus of the Kunlun Mountains	Oropsylla silantiewi	Cb4'	a1-a2-a3-a68'	b1-b2-b3-b4'	c1-c2-c3	10
A1973001	Medievalis	Xinjiang Wuqia, China	A	Marmota caudate plague focus of the Pamirs Plateau	Marmota caudata	Cb4'	a1-a2-a3-a68	b1-b2-b3-b4'	c1-c2-c3	11
K11972002	Medievalis	Xinjiang Luopu, China	K	Marmota himalayana plague focus of the Kunlun Mountains	patient	Cb4'	a1-a2-a3-a68	b1-b2-b3-b4'	c1-c2-c3	11
K11972003	Medievalis	Xinjiang Luopu, China	K	Marmota himalayana plague focus of the Kunlun Mountains	patient	Cb4'	a1-a2-a3-a68	b1-b2-b3-b4'	c1-c2-c3	11
K11973001	Medievalis	Xinjiang Hetian, China	K	Marmota himalayana plague focus of the Kunlun Mountains	Marmota himalayana	Cb4'	a1-a2-a3-a68	b1-b2-b3-b4'	c1-c2-c3	11
K11973004	Medievalis	Xinjiang Hetian, China	K	Marmota himalayana plague focus of the Kunlun Mountains	Oropsylla silantiewi	Cb4'	a1-a2-a3-a68	b1-b2-b3-b4'	c1-c2-c3	11
K11979001	Medievalis	Xinjiang Hetian, China	K	Marmota himalayana plague focus of the Kunlun Mountains	Marmota himalayana	Cb4'	a1-a2-a3-a68	b1-b2-b3-b4'	c1-c2-c3	11
B42003030	Antiqua	Xinjiang Wenquan, China	B	Marmota baibacina–Spermophilus undulates plague focus of the Tianshan Mountains	Marmota baibacina	Ca37	a1-a2-a3-a4-a5-a37	b1-b2-b3-b4	c1-c2-c3	12
B41976002	Antiqua	Xinjiang Nileke, China	B	Marmota baibacina–Spermophilus undulates plague focus of the Tianshan Mountains	Spermophilus undulatus	Ca37	a1-a2-a3-a4-a5-a6-a37-a38-a39-a40-a41-a50	b1-b2-b3-b4-b10-b23-b24-b25-b26	c1-c2-c3-c7	13
B41983001	Antiqua	Xinjiang Nileke, China	B	Marmota baibacina–Spermophilus undulates plague focus of the Tianshan Mountains	Marmota baibacina	Ca37	a1-a2-a3-a4-a5-a6-a37-a38-a39-a40-a41-a50	b1-b2-b3-b4-b10-b23-b24-b25-b26	c1-c2-c3-c7	13
B41976004	Antiqua	Xinjiang Nileke, China	B	Marmota baibacina–Spermophilus undulates plague focus of the Tianshan Mountains	Marmota baibacina	Ca37	a1-a2-a3-a4-a5-a6-a37-a38-a39-a40-a41-a50-a51	b1-b2-b3-b4-b10-b23-b24-b25-b26	c1-c2-c3-c7	14
D2004001	Antiqua	Qinghai Qilian, China	D	Marmota himalayana plague focus of the Qilian Mountain	patient body	Ca37	a1-a2-a3-a4-a5-a6-a37-a66-a67-a76-a69-a70	b1-b2-b3-b4-b42-b43	c3-c9-c10	15
M2004001	Antiqua	Qinghai Chengduo, China	M	Marmota fuscus plague focus of the Qinghai–Tibet Plateau	patient body	Ca37	a1-a2-a3-a4-a5-a6-a37-a66-a67-a76-a69-a70	b1-b2-b3-b4-b42-b43	c3-c9-c10	15
B31978001	Antiqua	Xinjiang Wusu, China	B	Marmota baibacina–Spermophilus undulates plague focus of the Tianshan Mountains	Marmota baibacina	Ca37	a1-a2-a3-a4-a6-a37-a39-a71-a46	b1-b2-b3-b4-b23	c1-c3	16
B31994001	Antiqua	Xinjiang Wusu, China	B	Marmota baibacina–Spermophilus undulates plague focus of the Tianshan Mountains	Marmota baibacina	Ca37	a1-a2-a3-a4-a6-a37-a39-a71-a46	b1-b2-b3-b4-b23	c1-c3	16
A1966001	Antiqua	Xinjiang Wuqia, China	A	Marmota caudate plague focus of the Pamirs Plateau	Marmota caudata	Ca37	a1-a3-a4-a5-a6-a37-a38-a39-a40-a41-a42-a43-a44-a72	b1-b2-b3-b4-b10-b23-b24-b25-b26-b27-b28	c1-c2-c3	17
B30000013	Antiqua	Xinjiang Wusu, China	B	Marmota baibacina–Spermophilus undulates plague focus of the Tianshan Mountains	Marmota baibacina	Ca37	a1-a3-a4-a5-a6-a37-a38-a39-a40-a41-a42-a43-a44-a72	b1-b2-b3-b4-b10-b23-b24-b25-b26-b27-b28	c1-c2-c3	17
B31969001	Antiqua	Xinjiang Jinghe, China	B	Marmota baibacina–Spermophilus undulates plague focus of the Tianshan Mountains	Marmota baibacina	Ca37	a1-a3-a4-a5-a6-a37-a38-a39-a40-a41-a42-a43-a44-a72	b1-b2-b3-b4-b10-b23-b24-b25-b26-b27-b28	c1-c2-c3	17
B31971001	Antiqua	Xinjiang Wusu, China	B	Marmota baibacina–Spermophilus undulates plague focus of the Tianshan Mountains	Marmota baibacina	Ca37	a1-a3-a4-a5-a6-a37-a38-a39-a40-a41-a42-a43-a44-a72	b1-b2-b3-b4-b10-b23-b24-b25-b26-b27-b28	c1-c2-c3	17
B32005017	Antiqua	Xinjiang Wusu, China	B	Marmota baibacina–Spermophilus undulates plague focus of the Tianshan Mountains	Citellophilus tesquorum	Ca37	a1-a3-a4-a5-a6-a37-a38-a39-a40-a41-a42-a43-a44-a72	b1-b2-b3-b4-b10-b23-b24-b25-b26-b27-b28	c1-c2-c3	17
K21987003	/	Xinjiang Qiemo, China	K	Marmota himalayana plague focus of the Kunlun Mountains	Rhadinopsylla li ventricosa	Ca37	a1-a3-a4-a5-a6-a37-a38-a39-a40-a41-a42-a43-a44-a72	b1-b2-b3-b4-b10-b23-b24-b25-b26-b27-b28	c1-c2-c3	17
B21967001	Antiqua	Xinjiang Hutubi, China	B	Marmota baibacina–Spermophilus undulates plague focus of the Tianshan Mountains	Marmota baibacina	Ca37	a1-a3-a4-a5-a6-a37-a38-a39-a40-a41-a42-a43-a44-a72	b1-b2-b3-b4-b10-b23-b24-b25-b26-b27-b28-b45	c1-c2-c3	18
B31983002	Antiqua	Xinjiang Wusu, China	B	Marmota baibacina–Spermophilus undulates plague focus of the Tianshan Mountains	Citellophilus tesquorum	Ca37	a1-a3-a4-a5-a6-a37-a38-a39-a40-a42-a43-a44-a72	b1-b2-b3-b4-b10-b23-b24-b25-b26-b27-b28	c1-c2-c3	19
B31994002	Antiqua	Xinjiang Wusu, China	B	Marmota baibacina–Spermophilus undulates plague focus of the Tianshan Mountains	Marmota baibacina	Ca37	a1-a3-a4-a5-a6-a37-a38-a39-a40-a42-a43-a44-a72	b1-b2-b3-b4-b10-b23-b24-b25-b26-b27-b28	c1-c2-c3	19
B21972002	Antiqua	Xinjiang Hutubi, China	B	Marmota baibacina–Spermophilus undulates plague focus of the Tianshan Mountains	patient body	Ca37	a1-a3-a4-a6-a37-a39-a71-a46-a47-a48	b1-b23	c1-c2-c3	20
B21972003	Antiqua	Xinjiang Manasi, China	B	Marmota baibacina–Spermophilus undulates plague focus of the Tianshan Mountains	Marmota baibacina	Ca37	a1-a3-a4-a6-a37-a39-a71-a46-a47-a48	b1-b23	c1-c2-c3	20
B31982001	Antiqua	Xinjiang Jinghe, China	B	Marmota baibacina–Spermophilus undulates plague focus of the Tianshan Mountains	Citellophilus tesquorum	Ca37	a1-a3-a4-a6-a37-a39-a71-a46-a47-a48	b1-b23	c1-c2-c3	20
K21985005	Antiqua	Xinjiang Ruoqiang, China	K	Marmota himalayana plague focus of the Kunlun Mountains	Oropsylla silantiewi	Ca37	a1-a3-a4-a6-a37-a39-a71-a46-a47-a48-a49	b1-b23	c1-c2-c3	21
A1992001	Antiqua	Xinjiang Wuqia, China	A	Marmota caudate plague focus of the Pamirs Plateau	Oropsylla silantiewi	Ca7	a1-a2-a3-a4-a5-a6-a7	b1-b2-b3-b4	c1-c2-c3	22
A1997001	Antiqua	Xinjiang Wuqia, China	A	Marmota caudate plague focus of the Pamirs Plateau	Marmota caudata	Ca7	a1-a2-a3-a4-a5-a6-a7	b1-b2-b3-b4	c1-c2-c3	22
B11979001	Antiqua	Xinjiang Atushen, China	B	Marmota baibacina–Spermophilus undulates plague focus of the Tianshan Mountains	Marmota baibacina	Ca7	a1-a2-a3-a4-a5-a6-a7	b1-b2-b3-b4	c1-c2-c3	22
B11992002	Antiqua	Xinjiang Atushen, China	B	Marmota baibacina–Spermophilus undulates plague focus of the Tianshan Mountains	Marmota baibacina	Ca7	a1-a2-a3-a4-a5-a6-a7	b1-b2-b3-b4	c1-c2-c3	22
C1960004	/	Gansu Xiahe, China	C	Marmota himalayana plague focus of the Qinghai–Gansu–Tibet Grassland	Marmota himalayana	Ca7	a1-a2-a3-a4-a5-a6-a7	b1-b2-b3-b4	c1-c2-c3	22
C1961006	Antiqua	Gansu Akesai, China	C	Marmota himalayana plague focus of the Qinghai–Gansu–Tibet Grassland	Marmota himalayana	Ca7	a1-a2-a3-a4-a5-a6-a7	b1-b2-b3-b4	c1-c2-c3	22
C1972001	Antiqua	Qinghai Lenghu, China	C	Marmota himalayana plague focus of the Qinghai–Gansu–Tibet Grassland	Oropsylla silantiewi	Ca7	a1-a2-a3-a4-a5-a6-a7	b1-b2-b3-b4	c1-c2-c3	22
C1976001	Antiqua	Gansu Akesai, China	C	Marmota himalayana plague focus of the Qinghai–Gansu–Tibet Grassland	Marmota himalayana	Ca7	a1-a2-a3-a4-a5-a6-a7	b1-b2-b3-b4	c1-c2-c3	22
C1978011	Antiqua	Qinghai Angqian, China	C	Marmota himalayana plague focus of the Qinghai–Gansu–Tibet Grassland	Meles	Ca7	a1-a2-a3-a4-a5-a6-a7	b1-b2-b3-b4	c1-c2-c3	22
C1983002	Antiqua	Tibet Changdu, China	C	Marmota himalayana plague focus of the Qinghai–Gansu–Tibet Grassland	Marmota himalayana	Ca7	a1-a2-a3-a4-a5-a6-a7	b1-b2-b3-b4	c1-c2-c3	22
C1990002	Antiqua	Tibet Changdu, China	C	Marmota himalayana plague focus of the Qinghai–Gansu–Tibet Grassland	Marmota himalayana	Ca7	a1-a2-a3-a4-a5-a6-a7	b1-b2-b3-b4	c1-c2-c3	22
C1992001	Antiqua	Tibet Nierong, China	C	Marmota himalayana plague focus of the Qinghai–Gansu–Tibet Grassland	Marmota himalayana	Ca7	a1-a2-a3-a4-a5-a6-a7	b1-b2-b3-b4	c1-c2-c3	22
C1994002	Antiqua	Tibet Biru, China	C	Marmota himalayana plague focus of the Qinghai–Gansu–Tibet Grassland	Ovis aries	Ca7	a1-a2-a3-a4-a5-a6-a7	b1-b2-b3-b4	c1-c2-c3	22
C1997001	Antiqua	Qinghai Angqian, China	C	Marmota himalayana plague focus of the Qinghai–Gansu–Tibet Grassland	Ovis aries	Ca7	a1-a2-a3-a4-a5-a6-a7	b1-b2-b3-b4	c1-c2-c3	22
K21985002	Antiqua	Xinjiang Ruoqiang, China	K	Marmota himalayana plague focus of the Kunlun Mountains	Marmota himalayana	Ca7	a1-a2-a3-a4-a5-a6-a7	b1-b2-b3-b4	c1-c2-c3	22
K21985003	Antiqua	Xinjiang Ruoqiang, China	K	Marmota himalayana plague focus of the Kunlun Mountains	Mus musculus	Ca7	a1-a2-a3-a4-a5-a6-a7	b1-b2-b3-b4	c1-c2-c3	22
M1999001	Antiqua	Sichuan Shiqu, China	M	Marmota fuscus plague focus of the Qinghai–Tibet Plateau	patient body	Ca7	a1-a2-a3-a4-a5-a6-a7	b1-b2-b3-b4	c1-c2-c3	22
C1976008	Antiqua	Qinghai Wulan, China	C	Marmota himalayana plague focus of the Qinghai–Gansu–Tibet Grassland	Canis sp.	Ca7	a1-a2-a3-a4-a5-a6-a7	b1-b2-b3-b4-b44	c1-c2-c3	23
C1954002	Antiqua	Qinghai Henan, China	C	Marmota himalayana plague focus of the Qinghai–Gansu–Tibet Grassland	Ochotona daurica	Ca7	a1-a2-a3-a4-a6-a7	b1-b2-b3-b4	c1-c2-c3	24
D1964001	Antiqua	Qinghai Menyuan, China	D	Marmota himalayana plague focus of the Qilian Mountain	Marmota	Ca7	a1-a2-a3-a4-a6-a7	b1-b2-b3-b4	c1-c2-c3	24
D1964002	Antiqua	Qinghai Menyuan, China	D	Marmota himalayana plague focus of the Qilian Mountain	Canis sp.	Ca7	a1-a2-a3-a4-a6-a7	b1-b2-b3-b4	c1-c2-c3	24
D2001002	Antiqua	Qinghai Tongde, China	D	Marmota himalayana plague focus of the Qilian Mountain	patient body	Ca7	a1-a2-a3-a5-a6-a7-a35	b1-b2-b3-b4	c1-c2-c3	25
C0000002	Antiqua	Qinghai Gonghe, China	C	Marmota himalayana plague focus of the Qinghai–Gansu–Tibet Grassland	Pulex irritans	Ca7	a1-a2-a3-a4-a5-a6-a7-a35	b1-b2-b3-b4	c1-c2-c3	26
C1961004	Antiqua	Gansu Gannan, China	C	Marmota himalayana plague focus of the Qinghai–Gansu–Tibet Grassland	Marmota himalayana	Ca7	a1-a2-a3-a4-a5-a6-a7-a35	b1-b2-b3-b4	c1-c2-c3	26
D0000002	Antiqua	Qinghai Qilian, China	D	Marmota himalayana plague focus of the Qilian Mountain	/	Ca7	a1-a2-a3-a4-a5-a6-a7-a35	b1-b2-b3-b4	c1-c2-c3	26
D0000003	Antiqua	Qinghai Qilian, China	D	Marmota himalayana plague focus of the Qilian Mountain	/	Ca7	a1-a2-a3-a4-a5-a6-a7-a35	b1-b2-b3-b4	c1-c2-c3	26
C2000001	/	Qinghai Delingha, China	C	Marmota himalayana plague focus of the Qinghai–Gansu–Tibet Grassland	Neoheomatoplnus plaearctus	Ca7	a1-a2-a3-a4-a5-a6-a7-a35-a60	b1-b2-b3-b4	c1-c2-c3	27
C1978008	Antiqua	Qinghai Zhiduo, China	C	Marmota himalayana plague focus of the Qinghai–Gansu–Tibet Grassland	Felis sp.	Ca7	a1-a2-a3-a4-a5-a6-a7-a36	b1-b2-b3-b4	c1-c2-c3	28
C1974001	Antiqua	Qinghai Gangcha, China	C	Marmota himalayana plague focus of the Qinghai–Gansu–Tibet Grassland	Rhadinopsus liventricosa	Ca7	a1-a2-a3-a4-a5-a6-a7-a65	b1-b2-b3-b4	c1-c2-c3	29
C2004007	Antiqua	Qinghai Wulan, China	C	Marmota himalayana plague focus of the Qinghai–Gansu–Tibet Grassland	patient	Ca7	a1-a2-a3-a4-a5-a6-a7-a65	b1-b2-b3-b4	c1-c2-c3	29
F0000002	Orientalis	Guangxi Longlin, China	F	Rattus flavipectus plague focus of the Yunnan–Guangdong–Fujian provinces	/	Ca8	a1-a2-a3-a4-a5-a6-a7-a8	b1-b2-b3-b4-b5	c1-c2-c3	30
F1943002	Orientalis	Fujian Fuzhou, China	F	Rattus flavipectus plague focus of the Yunnan–Guangdong–Fujian provinces	patient body	Ca8	a1-a2-a3-a4-a5-a6-a7-a8	b1-b2-b3-b4-b5	c1-c2-c3	30
F1953002	Orientalis	Yunnan Baoshan, China	F	Rattus flavipectus plague focus of the Yunnan–Guangdong–Fujian provinces	Rattus flavipectus	Ca8	a1-a2-a3-a4-a5-a6-a7-a8	b1-b2-b3-b4-b5	c1-c2-c3	30
F1984003	Orientalis	Yunnan Yingjiang, China	F	Rattus flavipectus plague focus of the Yunnan–Guangdong–Fujian provinces	Xenopsylla cneopis roths	Ca8	a1-a2-a3-a4-a5-a6-a7-a8	b1-b2-b3-b4-b5	c1-c2-c3	30
F1995007	Orientalis	Burma	F	Rattus flavipectus plague focus of the Yunnan–Guangdong–Fujian provinces	Rattus flavipectus	Ca8	a1-a2-a3-a4-a5-a6-a7-a8	b1-b2-b3-b4-b5	c1-c2-c3	30
F1950001	Orientalis	Fujian Huaan, China	F	Rattus flavipectus plague focus of the Yunnan–Guangdong–Fujian provinces	Rattus	Ca8	a1-a2-a3-a4-a5-a6-a7-a8-a58	b1-b2-b3-b4-b5	c1-c2-c3	31
F1946001	Orientalis	Fujian Gutian, China	F	Rattus flavipectus plague focus of the Yunnan–Guangdong–Fujian provinces	patient	Ca8	a1-a2-a3-a4-a5-a6-a7-a8-a59	b1-b2-b3-b4-b5	c1-c2-c3	32
F1984001	Orientalis	Yunnan Yingjiang, China	F	Rattus flavipectus plague focus of the Yunnan–Guangdong–Fujian provinces	Rattus flavipectus	Ca8	a1-a2-a3-a4-a5-a6-a7-a8-a73	b1-b2-b3-b4-b5	c1-c2-c3	33
F1984002	Orientalis	Yunnan Yingjiang, China	F	Rattus flavipectus plague focus of the Yunnan–Guangdong–Fujian provinces	Rattus flavipectus	Ca8	a1-a2-a3-a4-a5-a6-a7-a8-a73	b1-b2-b3-b4-b5	c1-c2-c3	33
F2002007	Orientalis	Guizhou Xingyi, China	F	Rattus flavipectus plague focus of the Yunnan–Guangdong–Fujian provinces	Rattus flavipectus	Ca8	a1-a2-a3-a4-a5-a6-a7-a8-a74	b1-b2-b3-b4-b5	c1-c2-c3	34
F1954001	Antiqua	Yunnan Xiangyun, China	F	Rattus flavipectus plague focus of the Yunnan–Guangdong–Fujian provinces	Rattus flavipectus	Ca52	a1-a2-a3-a5-a6-a7-a52	b1-b2-b3-b4	c1-c2-c3	35
E1977003	/	Yunnan Jianchuan, China	E	Apodemus chevrieri–Eothenomys miletus plague focus of the highland of Northwestern Yunnan province	Apodemus speciosus	Ca52	a1-a2-a3-a5-a6-a7-a52	b1-b2-b3-b4	c1-c2-c3	35
E1982002	Antiqua	Yunnan Jianchuan, China	E	Apodemus chevrieri–Eothenomys miletus plague focus of the highland of Northwestern Yunnan province	Frontopsylla spadix	Ca52	a1-a2-a3-a5-a6-a7-a52	b1-b2-b3-b4	c1-c2-c3	35
E1983004	Antiqua	Yunnan Jianchuan, China	E	Apodemus chevrieri–Eothenomys miletus plague focus of the highland of Northwestern Yunnan province	Eothenomys miletus	Ca52	a1-a2-a3-a5-a6-a7-a52	b1-b2-b3-b4	c1-c2-c3	35
E1984003	Antiqua	Yunnan Jianchuan, China	E	Apodemus chevrieri–Eothenomys miletus plague focus of the highland of Northwestern Yunnan province	Eothenomys miletus	Ca52	a1-a2-a3-a5-a6-a7-a52	b1-b2-b3-b4	c1-c2-c3	35
L1970015	Microtus/xilingolensis	Inner Mongolia Abahanaerqi, China	L	Marmota brandti plague focus of the Xilin Gol Grassland	Allactaga sibirica	Cc1	a1-a4-a6	b1-b2-b3-b4	c1	36
L1970003=91001	Microtus/xilingolensis	Inner Mongolia Abagaqi, China	L	Marmota brandti plague focus of the Xilin Gol Grassland	Microtus brandti	Cc1	a1-a4-a6	b1-b2-b3-b4	c1	36
M2000005	Microtus/qinghaiensis	Sichuan Shiqu, China	M	Marmota fuscus plague focus of the Qinghai–Tibet Plateau	Microtus fuscus	Cc3	a1-a4-a6	b1-b2-b3-b4-b10	c1-c2-c3	37
M2001006	Microtus/qinghaiensis	Qinghai Chengduo, China	M	Marmota fuscus plague focus of the Qinghai–Tibet Plateau	Microtus fuscus	Cc3	a1-a4-a6	b1-b2-b3-b4-b10	c1-c2-c3	37
C1962002	Antiqua	Qinghai Xinghai, China	C	Marmota himalayana plague focus of the Qinghai–Gansu–Tibet Grassland	patient body	Ca7	a1-a2-a3-a4-a5-a6-a7	b1-b9-b3-b4-b41	c1-c2	38
101(146)	Medievalis	Volga-Ural sandy focus 16, Russia	16	Meriones meridianus plague Volga-Ural sandy focus	fleas	Cb4'	a1-a2-a3-a78-a79	b1-b2-b3-b4’-b46	c1-c2-c3	39
625(44)	Medievalis	Ural-Emba focus 18, Kazakhstan	18	Rhombomys opimus plague Ural-Emba focus	Diplomesodon pulchellum	Cb4'	a1-a2-a3	b1-b2-b3-b4’	c1-c2-c3	9
358	Medievalis	North-Pre-Aral focus 21, Kazakhstan	21	Rhombomys opimus plague North-Pre-Aral focus	patient	Cb4'	a1-a2-a3	b1-b2-b3-b4’	c1-c2-c3	9
(K1)780	Medievalis	Kyzyl-Kum focus 27, Uzbekistan or Kazakhstan	27	Rhombomys opimus plague Kyzyl-Kum focus	/	Cb4'	a1-a2-a3	b1-b2-b3-b4’	c1-c2-c3	9
I-84	Antiqua	Soktui-Milozan, Chita Region, Trans-Baikal focus 38, Russia	38	Citellus dauricus plague Trans-Baikal focus	Marmota sibirica	Cb4	a1-a2-a3	b1-b2-b3-b4	c1-c2-c3	7
I-1996	Antiqua	Ust'-Buluktui Fold, Chita Region, Trans-Baikal focus 38, Russia	38	Citellus dauricus plague Trans-Baikal focus	Spermophilus dauricus	Cb4	a1-a2-a3	4*	3*	7
I-3448	Antiqua	Buure Tract, Mongun-Taigin mesofocus 37, Tuva focus, Russia	37	Citellus undulatus plague Mongun-Taigin mesofocus of Tuva focus	Citellus undulatus	Ca7	a1-a2-a3-a4-a5-a6-a7-a30	b1-b2-b3-b4-b47	c1-c2-c3'	40
I-3449	Antiqua	Buure Tract, Mongun-Taigin mesofocus 37, Tuva focus, Russia	37	Citellus undulatus plague Mongun-Taigin mesofocus of Tuva focus	Citellophilus tesquorum	Ca7	a1-a2-a3-a4-a5-a6-a7-a30	5*	3*	40
1192	Antiqua	Mongun-Taigin mesofocus 37, Tuva focus, Russia	37	Citellus undulatus plague Mongun-Taigin mesofocus of Tuva focus	Citellophilus tesquorum	Ca7	a1-a2-a3-a4-a5-a6-a7-a30	5*	3*	40
I-3113	Antiqua	Kyzyl-Khaya Tract, right bank of the Barlyk river, Sagly mesofocus 41, Tuva focus, Russia	41	Citellus undulatus plague Sagly mesofocus of Tuva focus	Marmota sibirica	Ca7	a1-a2-a3-a4-a5-a6-a7-a34	b1-b2-b3-b4	c1-c2-c3	41
I-3104	Antiqua	Hentiy province (aymag), Mongolia	/	Marmota sibirica plague Church focus	Necrodes littoralis	Cb2	a1-a2-a3	b1-b2	c1-c2-c3	1
231	Antiqua	Aksai focus 33, Kirghizia	33	Marmota baibacina plague Aksai focus	Marmota baibacina	Ca7	a1-a2-a3-a4-a6-a7	b1-b2-b3-b4	c1-c2-c3	22
A-1725	Microtus/hissarica	Gissar focus 34, Tadjikistan	34	Microtus carruthersi plague Gissar focus	Marmota caudate	Cc3	a1-a4-a6	b1-b2-b3-b4-b10	c1-c2-c3	37
1146	Microtus/caucasica	Zanzegur-Karabakh focus 6, Armenia	6	Microtus arvalis plague Zanzegur-Karabakh focus (one of Tran-Caucasian-highland foci)	Microtus arvalis	Ca13	a1-a2-a3-a4-a5-a13-a81	b1-b9-b2-b10-b11-b12	c1-c2-c3-c5-c6	42
C-564	Microtus/caucasica	Tran-Caucasian-highland foci 4 or 5 or 6, Armenia	4/5/6	Microtus arvalis plague Tran-Caucasian-highland foci	Ctenophtalmus terres	Ca13	a1-a2-a3-a4-a5-a13-a14	6*	c1-c2-c3-c5-c6	43
C-582	Microtus/caucasica	Tran-Caucasian-highland foci 4 or 5 or 6, Armenia	4/5/6	Microtus arvalis plague Tran-Caucasian-highland foci	Microtus arvalis	Ca13	a1-a2-a3-a4-a5-a13	b1-b9-b2-b10-b11-b12	c1-c2-c3-c5-c6	44
I-2226	Microtus/ulegeica	Bayanölgie province (aymag), Mongolia	/	Microtus gregalis-Alticola strelzovi-Ochotona pallasi pricei plague Buchenul focus	fleas Amphalius runatus	Ca37'	a1-a2-a3-a4-a5-a37’-a82	5*	2*	45
I-2422	Microtus/ulegeica	Bayanölgie province (aymag), Mongolia	/	Microtus gregalis-Alticola strelzovi-Ochotona pallasi pricei plague Buchenul focus	fleas Amphalius runatus	Ca37'	a1-a2-a3-a4-a5-a37’-a82	b1-b2-b3-b4-b10	c1-c3	45
I-2836	Microtus/ulegeica	Bayanölgie province (aymag), Mongolia	/	Microtus gregalis-Alticola strelzovi-Ochotona pallasi pricei plague Buchenul focus	Ochotona pallasi pricei	Ca37'	a1-a2-a3-a4-a5-a37’-a82	5*	2*	45
I-3442	Microtus/altaica	Mountain-Altai focus 36, Russia	36	Microtus gregalis-Alticola strelzovi-Ochotona pricei plague Mountain-Altai focus	fleas Amphalius runatus	Cc2	a1-a4-a6	b1-b3-b4-b10	c1-c2	46
0-Antiqua	Antiqua	Africa	/	/	/	unassigned	a1-a2-a3-a4-a10-a11	b1-b3-b8	c1-c2-c3	47
0-CO92	Orientalis	North America	/	/	/	Ca8	a1-a2-a3-a4-a5-a6-a7-a8	b1-b2-b3-b4-b5	c1-c2-c3	30
0-KIM	Medievalis	Iran/Kurdistan	/	/	patient	Cb4'	a1-a2-a3	b1-b2-b3-b4'	c1-c2-c3	9
0-Nepal516	Antiqua	Nepal	/	/	/	Cb4	a1	b1-b2-b3-b4	c1-c2-c3	48
0-pestodies_F	Microtus/caucasica	Tran-Caucasian-highland foci 4 or 5 or 6 or Dagestan-highland focus 39			/	Ca13	a1-a2-a3-a4-a5-a13	b1-b9-b2-b10-b11-b12	c1-c2-c3-c5-c6	44
0-angola	Antiqua	Africa	/	/	/	unassigned	a1-a3-a4-a37''	/	/	49
* sequences of these loci were unavailable, and the single number in cells reperesents the number of spacers in corresponding locus
/ unavailable data
